# Supplementary material
Source: publisher site journal article supplement (https://www.dovepress.com/article/366619)
Supplement: Supplementary file 1 [file get_supplementary_file.php]

## Supplementary file of manuscript entitled:

### **Anticipation of relapse and acute graft-versus-host disease after allogeneic peripheral blood stem cell transplantation: The fundamental role of the antigen presenting (dendritic) cells**

**Journal of Inflammation Research**

**Correspondence to:** Safaa AA Khaled

Email: [safaakhaled2003@gmail.com](mailto:safaakhaled2003@gmail.com)

Mahmoud I. Elbadry

Email: [mahmoudibrahem837@gmail.com](mailto:mahmoudibrahem837@gmail.com)

#### **1. SUPPLEMENTAL METHODS:**

**Table S1: Collective data of the study participants , 29 HLA matched siblings and 29 recipients underwent allogeneic peripheral blood stem cell transplantations**

|                                            | <b>Donors<br/>n= 29</b> | <b>Recipients<br/>n= 29</b> |
|--------------------------------------------|-------------------------|-----------------------------|
| <b>Mean age ± SE [years]</b>               | 20.8 ± 2.1              | 19.7+1.9                    |
| <b>Sex[M/F]</b>                            | 20/9                    | 14/15                       |
| <b>Blood group[O/A/B/AB]</b>               | 8 / 9 / 9 / 3           | 12 / 6 / 6/ 5               |
| <b>Virology [-ve/+ve]: -</b>               |                         |                             |
| HCV Ab                                     | 26/3                    | 16/13                       |
| HBs Ag                                     | 29/-                    | 27/2                        |
| HBs Ab                                     | 19/10                   | 18/11                       |
| HBc Ag                                     | 29/-                    | 29/-                        |
| HBc Ab                                     | 29/-                    | 29/-                        |
| HIV-Ab                                     | 29/-                    | 29/-                        |
| HSV Ab                                     | 19/10                   | 20/9                        |
| CMV[IgG]                                   | 7/22                    | 8/21                        |
| CMV[IgM]                                   | 29/-                    | 29/-                        |
| <b>Myeloablative /Mini-transplantation</b> | -                       | 22/7                        |

Abbreviation: M=Male; F=Female; HCV Ab=Hepatitis C virus antibody; HBs Ag= Hepatitis B surface antigen; HBs Ab=Hepatitis B surface antibody; HBc Ag=Hepatitis B core antigen; HBc Ab=Hepatitis B core antibody; HIV Ab= Human immunodeficiency virus antibodies; HSV Ab=Herpes simplex viruses antibody; CMV= cytomegalovirus; Ig=immunoglobulin

**Table S2. Modified Glucksberg staging system for aGVHD**

| Stage | Skin (% body surface area)                                               | Liver (bilirubin) | Gut tract (stool output/day)*                                                                                                    |
|-------|--------------------------------------------------------------------------|-------------------|----------------------------------------------------------------------------------------------------------------------------------|
| 0     | No GVHD rash                                                             | <2 mg/dL          | Adult: <500 mL/day<br>Child: <10 mL/kg/day                                                                                       |
| 1     | Maculopapular rash <25%                                                  | 2-3 mg/dL         | Adult: 500-999 mL/day<br>Child: 10-19.9 mL/kg/day<br>OR persistent nausea, vomiting, or anorexia with a positive upper GI biopsy |
| 2     | Maculopapular rash 25-50%                                                | 3.1-6 mg/dL       | Adult: 1000-1500 mL/day<br>Child: 20-30 mL/kg/day                                                                                |
| 3     | Maculopapular rash >50%                                                  | 6.1-15 mg/dL      | Adult: >1500 mL/day<br>Child: >30 mL/kg/day                                                                                      |
| 4     | Generalized erythroderma plus bullous formation and desquamation >5% BSA | >15 mg/dL         | Severe abdominal pain with or without ileus, or grossly bloody stool (regardless of volume)                                      |

\*For Gut staging: The "adult" stool output values are used for patients > 50kg in weight

BSA, Body surface area

**Overall Clinical Grades**

- Grade 0: No stage 1-4 of any organ
- Grade I: Stage 1-2 rash and no liver or GI involvement
- Grade II: Stage 3 rash and/or Stage 1 liver and/or GI involvement
- Grade III: Stage 0-3 rash with Stage 2-3 liver or GI involvement
- Grade IV: Stage 4 skin, liver, or GI involvement

**Table S3. Treatment response criteria**

| Response                   | Criterion                                                                        |
|----------------------------|----------------------------------------------------------------------------------|
| <b>Complete Response</b>   | Absence of any signs or symptoms of aGVHD                                        |
| <b>Partial Response</b>    | Improvement in the severity of aGVHD by at least one grade compared to Visit 1   |
| <b>Stable Disease</b>      | No change in the grade of aGVHD compared to Visit 1                              |
| <b>Disease Progression</b> | Deterioration in the severity of aGVHD by at least one grade compared to Visit 1 |

**2. Supplemental Results**

**Table S4. Grafts and patients' characteristics of the study 29 recipients underwent allogeneic PBSCT.**

|                   | Sex | Underlying diagnosis | Conditioning Regimen | Kinetic assessment of the graft |                              |                          |                            |                               | aGVHD or Relapse |
|-------------------|-----|----------------------|----------------------|---------------------------------|------------------------------|--------------------------|----------------------------|-------------------------------|------------------|
|                   |     |                      |                      | TNC [X 10 <sup>9</sup> /L]      | CD34+ [X10 <sup>6</sup> /kg] | CMRF -44 <sup>+</sup> DC | CD11c <sup>+</sup> DC[DC1] | CD4 <sup>bright</sup> DC[DC2] |                  |
| <b>Group I:</b>   |     |                      |                      |                                 |                              |                          |                            |                               |                  |
| Case-1            | F   | SAA                  | Myeloablative        | 422                             | 12.9                         | 4.77                     | 4.009                      | 0.25                          | No               |
| Case-2            | M   | SAA                  | Myeloablative        | 333                             | 6.7                          | 11.09                    | 4.39                       | 5.82                          | No               |
| Case-3            | M   | SAA                  | Myeloablative        | 460                             | 10                           | 10.2                     | 4.0                        | 6.1                           | No               |
| Case-4            | M   | MM                   | Non-myeloablative    | 540                             | 18.8                         | 6.9                      | 3.1                        | 3.5                           | No               |
| Case-5            | F   | NHL                  | Myeloablative        | 170                             | 3.0                          | 4.2                      | 2.4                        | 2.003                         | No               |
| Case-6            | F   | B-TM                 | Myeloablative        | 565                             | 10.7                         | 10.1                     | 5.5                        | 4.18                          | No               |
| Case-7            | F   | B.TM                 | Myeloablative        | 272                             | 5.8                          | 3.2                      | 2.16                       | 1.25                          | No               |
| Case-8            | F   | AML(M5)              | Myeloablative        | 190                             | 8.4                          | 12.5                     | 5.44                       | 8.8                           | No               |
| Case-9            | F   | AML(M1)              | Non-myeloablative    | 900                             | 24                           | 7.2                      | 6.5                        | 0.36                          | No               |
| Case-10           | M   | AML(M1)              | Myeloablative        | 200                             | 6.5                          | 12.8                     | 11.04                      | 0.08                          | No               |
| Case-11           | F   | AML(M1)              | Myeloablative        | 370                             | 31                           | 9.6                      | 4.1                        | 3.07                          | No               |
| Case-12           | M   | AML(M5)              | Myeloablative        | 325                             | 8.8                          | 2.92                     | 1.83                       | 1.3                           | No               |
| Case-13           | M   | ALL(PRO-B)           | Myeloablative        | 370                             | 20                           | 11.88                    | 2.69                       | 3.4                           | No               |
| Case-14           | F   | MDS(RA)              | Non-myeloablative    | 655                             | 9.1                          | 13.7                     | 5.71                       | 11.79                         | No               |
| Case-15           | F   | MDS                  | Non-myeloablative    | 370                             | 25                           | 10.5                     | 6.65                       | 4.7                           | No               |
| Case-16           | M   | MDS                  | Non-myeloablative    | 565                             | 6.6                          | 5.1                      | 2.43                       | 4.3                           | No               |
| Case-17           | M   | CML                  | Myeloablative        | 600                             | 48                           | 5.25                     | 2.51                       | 3.7                           | No               |
| Case-18           | F   | CML                  | Myeloablative        | 400                             | 5.8                          | 13.4                     | 7.8                        | 6.04                          | No               |
| <b>Group II:</b>  |     |                      |                      |                                 |                              |                          |                            |                               |                  |
| Case-19           | M   | SAA                  | Myeloablative        | 324                             | 21.5                         | 11.72                    | 5.63                       | 6                             | aGVHD            |
| Case-20           | M   | SAA                  | Myeloablative        | 980                             | 14.0                         | *24.51                   | *19.6                      | 5.33                          | aGVHD            |
| Case-21           | F   | H.DL                 | Myeloablative        | 296                             | 19.5                         | 13.06                    | 6.0                        | 7.7                           | aGVHD            |
| Case-22           | F   | SAA                  | Myeloablative        | 390                             | 3.2                          | *28                      | *17.76                     | 8.8                           | aGVHD            |
| Case-23           | F   | AML(M4)              | Myeloablative        | 500                             | 4.3                          | *31.9                    | *21.24                     | 10.3                          | aGVHD            |
| Case-24           | M   | ALL(c-ALL)           | Myeloablative        | 169                             | 4.2                          | *28                      | *23.6                      | 3.9                           | aGVHD            |
| Case-25           | M   | ALL(PRO-B)           | Myeloablative        | 450                             | 3.0                          | *18.25                   | 11.18                      | 6.25                          | aGVHD            |
| Case-26           | M   | ALL(T-cell)          | Myeloablative        | 625                             | 4.6                          | 15.8                     | 7.6                        | 9.5                           | aGVHD            |
| Case-27           | F   | AML(M1)              | Non-myeloablative    | 400                             | 8.2                          | 14                       | 8.7                        | 4.7                           | aGVHD            |
| <b>Group III:</b> |     |                      |                      |                                 |                              |                          |                            |                               |                  |
| Case-28           | F   | AML(M1)              | Non-myeloablative    | 512                             | 2.6                          | *26.6                    | 5.9                        | *20.7                         | Relapse          |
| Case-29           | M   | ALL(T-cell)          | Myeloablative        | 540                             | 8.9                          | *20                      | 4.69                       | *16.14                        | Relapse          |

Abbreviations: F=Female; M=Male; TNC =Total nucleated cells; DC= dendritic cell; CMRF-44+= dendritic cell positive to CMRF-44 monoclonal antibody; SAA=Severe Aplastic Anaemia; B-TM=B-Thalassemia major; MDS=Myelodysplastic syndrome; NHL=Non Hodgkin Lymphoma; HDL=Hodgkin Lymphoma; AML=Acute Myeloid Leukaemia; ALL=Acute-lymphocytic leukaemia; CML=Chronic Myeloid Leukaemia ; MM=Multiple Myeloma; aGVHD=acute Graft-versus-host disease; PBSCT= Peripheral blood stem cell transplantation.

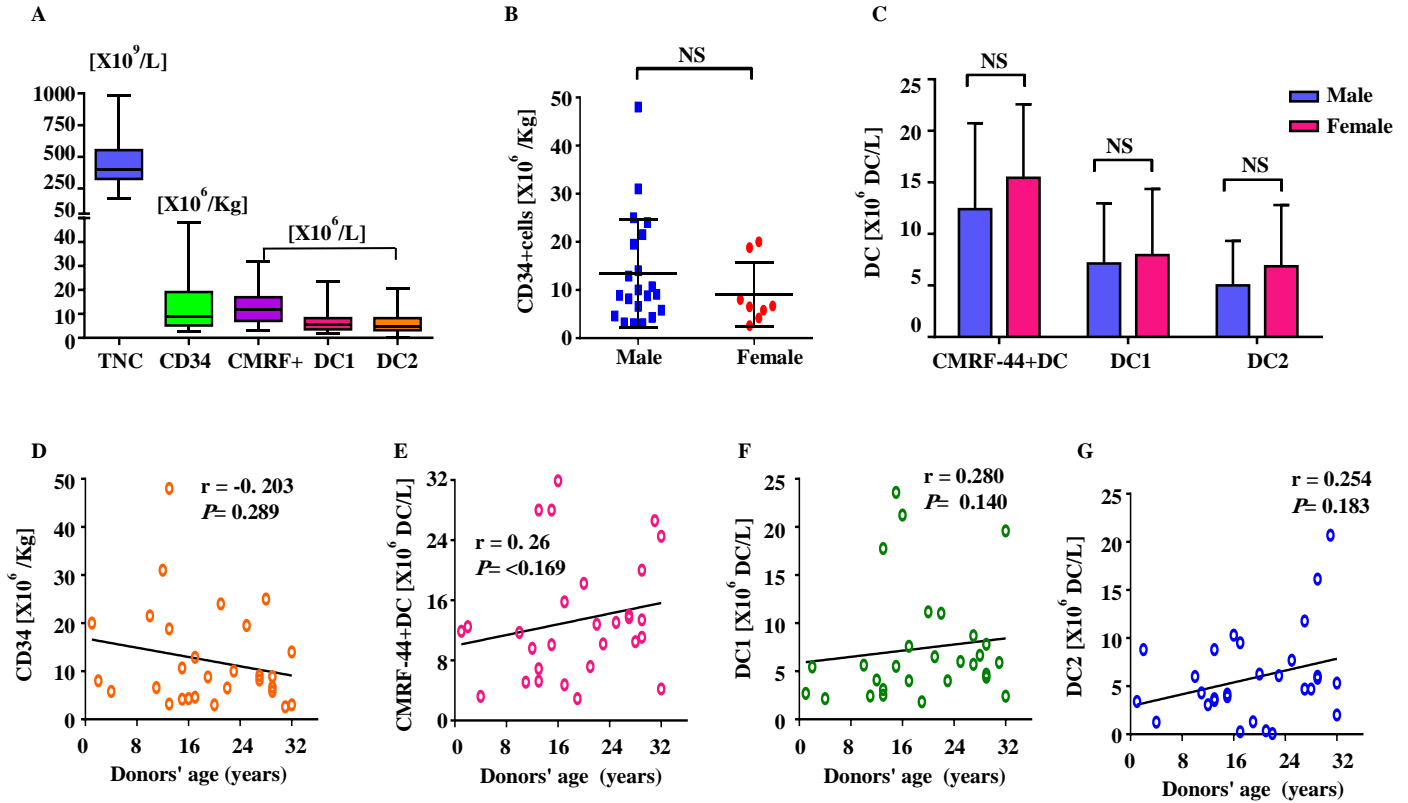

**Figure S1. Graft components of the study 29 recipients underwent allogeneic PBSCT, and their relationship with donor's age and gender.** (A) The bar charts represent the variable components of the grafts in 29 recipients underwent allogeneic PBSCT. (B) Comparison of CD34+ cell numbers in grafts from male and female donors. (C) Comparison of CMRF-44+DC, DC1 and DC2 cell numbers in grafts from male and female donors. Schematic box plots representing the correlations of different CD34+ cell numbers and types of DC among 29 grafts. Correlation between CD34+ cell count (D), CMRF-44+DC count (E), DC1 (F), DC2 count (F) and donors' age.

Abbreviations: TNC =Total nucleated cells; DC= dendritic cell; CMRF-44+=dendritic cell positive to CMRF-44 monoclonal antibody; r= the correlation coefficient; NS, non-significant.

**Table (S5): Dendritic cell components in relation to the incidence of acute GVHD:**

| Dendritic cell components          | Number of cases | Percentage | Grades of acute GVHD                                           |
|------------------------------------|-----------------|------------|----------------------------------------------------------------|
| ↑ CMRF-44 <sup>+</sup> DC          | One case        | 11.1 %     | grade II                                                       |
| ↑ CMRF-44 <sup>+</sup> DC<br>↑ DC1 | 4 cases         | 44.4%      | -2 cases grade II<br>-One case grade III<br>-One case grade IV |

Abbreviation: DC= dendritic cell; GVHD=acute Graft-versus-host disease.

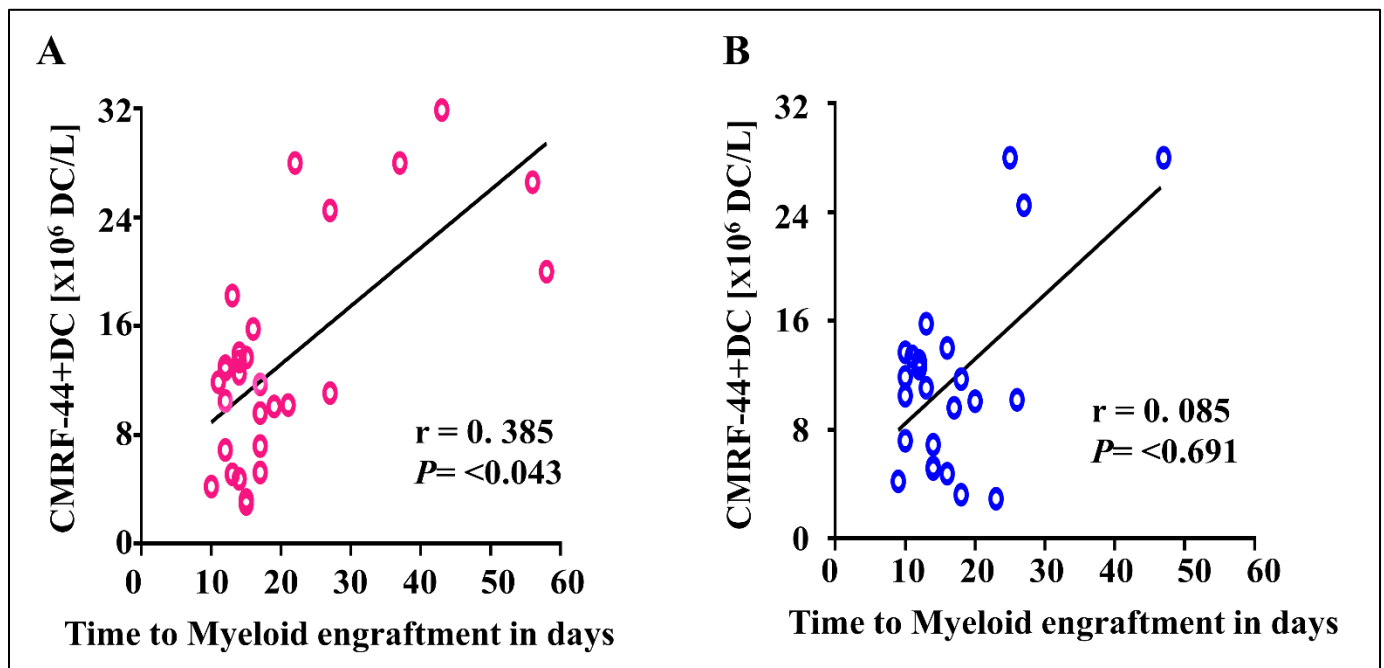

**Figure S2. High DCs numbers increased days to myeloid and platelet engraftment detection in 29 recipients underwent allogeneic PBSCT.** Schematic box plots representing the correlations of different time to myeloid cells (A), platelets engraftment (B) and CMRF-44+DC number in the grafts.

Abbreviations: DC= dendritic cell; CMRF-44+=dendritic cell positive to CMRF-44 monoclonal antibody; r= the correlation coefficient.

**Table (S6): Multivariate Tests<sup>c</sup>**

|                                                                                                                                                                      | <b>Effect</b>             | <b>Value</b> | <b>F</b>             | <b>Hypothesis df</b> | <b>Error df</b> | <b>Sig.</b> | <b>Partial Eta Squared</b> |
|----------------------------------------------------------------------------------------------------------------------------------------------------------------------|---------------------------|--------------|----------------------|----------------------|-----------------|-------------|----------------------------|
| <b>Intercept</b>                                                                                                                                                     | <b>Pillai's Trace</b>     | .990         | 1.382E2 <sup>a</sup> | 11.000               | 16.000          | .000        | .990                       |
|                                                                                                                                                                      | <b>Wilks' Lambda</b>      | .010         | 1.382E2 <sup>a</sup> | 11.000               | 16.000          | .000        | .990                       |
|                                                                                                                                                                      | <b>Hotelling's Trace</b>  | 95.010       | 1.382E2 <sup>a</sup> | 11.000               | 16.000          | .000        | .990                       |
|                                                                                                                                                                      | <b>Roy's Largest Root</b> | 95.010       | 1.382E2 <sup>a</sup> | 11.000               | 16.000          | .000        | .990                       |
| <b>Groups</b>                                                                                                                                                        | <b>Pillai's Trace</b>     | 1.375        | 3.396                | 22.000               | 34.000          | .001        | .687                       |
|                                                                                                                                                                      | <b>Wilks' Lambda</b>      | .094         | 3.281 <sup>a</sup>   | 22.000               | 32.000          | .001        | .693                       |
|                                                                                                                                                                      | <b>Hotelling's Trace</b>  | 4.630        | 3.157                | 22.000               | 30.000          | .002        | .698                       |
|                                                                                                                                                                      | <b>Roy's Largest Root</b> | 2.939        | 4.542 <sup>b</sup>   | 11.000               | 17.000          | .003        | .746                       |
| <p>a. Exact statistic</p> <p>b. The statistic is an upper bound on F that yields a lower bound on the significance level.</p> <p>c. Design: Intercept + Outcomes</p> |                           |              |                      |                      |                 |             |                            |

**Table (S7): Tests of Between-Subjects Effects**

| Source   | Dependent Variable                       | Type III Sum of Squares | df | Mean Square | F      | Sig. | Partial Eta Squared |
|----------|------------------------------------------|-------------------------|----|-------------|--------|------|---------------------|
| Outcomes | Age (years)                              | 275.640                 | 2  | 137.820     | 1.819  | .182 | .123                |
|          | TLC (X10 <sup>9</sup> /L)                | 134.873                 | 2  | 67.436      | .262   | .771 | .020                |
|          | Vol (ml <sup>3</sup> )                   | 1265.966                | 2  | 632.983     | .544   | .587 | .040                |
|          | TNC (X10 <sup>6</sup> /L)                | 31814.810               | 2  | 15907.405   | .355   | .705 | .027                |
|          | WT (Kg)                                  | 238.471                 | 2  | 119.236     | .263   | .771 | .020                |
|          | GC (%)                                   | 192.101                 | 2  | 96.050      | .795   | .462 | .058                |
|          | CD34 <sup>+</sup> (%)                    | 1.064                   | 2  | .532        | .273   | .764 | .021                |
|          | CD34 <sup>+</sup> (X10 <sup>6</sup> /kg) | 259.832                 | 2  | 129.916     | 1.250  | .303 | .088                |
|          | DC (X10 <sup>6</sup> /L)                 | 1070.045                | 2  | 535.022     | 19.479 | .000 | .600                |
|          | DC1 (X10 <sup>6</sup> /L)                | 485.597                 | 2  | 242.799     | 12.724 | .000 | .495                |
|          | DC2 (X10 <sup>6</sup> /L)                | 424.773                 | 2  | 212.386     | 23.672 | .000 | .646                |
| Error    | Age (years)                              | 1970.222                | 26 | 75.778      |        |      |                     |
|          | TLC (X10 <sup>9</sup> /L)                | 6686.931                | 26 | 257.190     |        |      |                     |
|          | Vol (ml <sup>3</sup> )                   | 30277.000               | 26 | 1164.500    |        |      |                     |
|          | TNC (X10 <sup>6</sup> /L)                | 1165462.500             | 26 | 44825.481   |        |      |                     |
|          | WT (Kg)                                  | 11797.667               | 26 | 453.756     |        |      |                     |
|          | GC (%)                                   | 3142.649                | 26 | 120.871     |        |      |                     |
|          | CD34 <sup>+</sup> (%)                    | 50.741                  | 26 | 1.952       |        |      |                     |
|          | CD34 <sup>+</sup> (X10 <sup>6</sup> /kg) | 2701.630                | 26 | 103.909     |        |      |                     |
|          | DC (X10 <sup>6</sup> /L)                 | 714.142                 | 26 | 27.467      |        |      |                     |
|          | DC1 (X10 <sup>6</sup> /L)                | 496.125                 | 26 | 19.082      |        |      |                     |
|          | DC2 (X10 <sup>6</sup> /L)                | 233.272                 | 26 | 8.972       |        |      |                     |
| Total    | Age (years)                              | 12791.000               | 29 |             |        |      |                     |
|          | TLC (X10 <sup>9</sup> /L)                | 77730.631               | 29 |             |        |      |                     |
|          | Vol (ml <sup>3</sup> )                   | 1168855.000             | 29 |             |        |      |                     |
|          | TNC (X10 <sup>6</sup> /L)                | 6665679.000             | 29 |             |        |      |                     |
|          | WT (Kg)                                  | 102421.000              | 29 |             |        |      |                     |
|          | GC (%)                                   | 26730.670               | 29 |             |        |      |                     |
|          | CD34 <sup>+</sup> (%)                    | 226.171                 | 29 |             |        |      |                     |
|          | CD34 <sup>+</sup> (X10 <sup>6</sup> /kg) | 7299.810                | 29 |             |        |      |                     |
|          | DC (X10 <sup>6</sup> /L)                 | 6952.639                | 29 |             |        |      |                     |
|          | DC1 (X10 <sup>6</sup> /L)                | 2563.242                | 29 |             |        |      |                     |
|          | DC2 (X10 <sup>6</sup> /L)                | 1562.150                | 29 |             |        |      |                     |

Abbreviations: Preph.TLC= peripheral Total leukocytic count; Vol.= volume of the graft; TNC =Total nucleated cells; Wt=weight of the patients; GC= gated cells; DC= dendritic cell

**Table (S8): Estimated Marginal Means**

| Dependent Variable          | Groups    | Mean    | Std. Error | 95% Confidence Interval |             |
|-----------------------------|-----------|---------|------------|-------------------------|-------------|
|                             |           |         |            | Lower Bound             | Upper Bound |
| Age (years)                 | Group I   | 17.667  | 2.052      | 13.449                  | 21.884      |
|                             | Group II  | 19.444  | 2.902      | 13.480                  | 25.409      |
|                             | Group III | 30.000  | 6.155      | 17.347                  | 42.653      |
| TLC (X10 <sup>9</sup> /L)   | Group I   | 48.926  | 3.780      | 41.156                  | 56.696      |
|                             | Group II  | 51.872  | 5.346      | 40.884                  | 62.860      |
|                             | Group III | 43.240  | 11.340     | 19.930                  | 66.550      |
| Vol (ml3)                   | Group I   | 192.944 | 8.043      | 176.411                 | 209.478     |
|                             | Group II  | 207.222 | 11.375     | 183.841                 | 230.604     |
|                             | Group III | 202.500 | 24.130     | 152.900                 | 252.100     |
| TNC (X10 <sup>6</sup> /L)   | Group I   | 411.500 | 49.903     | 308.923                 | 514.077     |
|                             | Group II  | 459.333 | 70.573     | 314.268                 | 604.399     |
|                             | Group III | 526.000 | 149.709    | 218.269                 | 833.731     |
| WT (Kg)                     | Group I   | 55.944  | 5.021      | 45.624                  | 66.265      |
|                             | Group II  | 53.444  | 7.101      | 38.849                  | 68.040      |
|                             | Group III | 65.500  | 15.062     | 34.539                  | 96.461      |
| GC (%)                      | Group I   | 30.267  | 2.591      | 24.940                  | 35.593      |
|                             | Group II  | 24.611  | 3.665      | 17.078                  | 32.144      |
|                             | Group III | 28.700  | 7.774      | 12.720                  | 44.680      |
| CD34+ (%)                   | Group I   | 2.494   | .329       | 1.818                   | 3.171       |
|                             | Group II  | 2.523   | .466       | 1.566                   | 3.481       |
|                             | Group III | 1.750   | .988       | -.280                   | 3.780       |
| CD34+(X10 <sup>6</sup> /kg) | Group I   | 14.483  | 2.403      | 9.545                   | 19.422      |
|                             | Group II  | 9.167   | 3.398      | 2.182                   | 16.151      |
|                             | Group III | 5.750   | 7.208      | -9.066                  | 20.566      |
| DC (X10 <sup>6</sup> /L)    | Group I   | 8.628   | 1.235      | 6.089                   | 11.168      |
|                             | Group II  | 20.582  | 1.747      | 16.991                  | 24.173      |
|                             | Group III | 23.300  | 3.706      | 15.682                  | 30.918      |
| DC1 (X10 <sup>6</sup> /L)   | Group I   | 4.570   | 1.030      | 2.454                   | 6.686       |
|                             | Group II  | 13.479  | 1.456      | 10.486                  | 16.472      |
|                             | Group III | 5.295   | 3.089      | -1.054                  | 11.644      |
| DC2 (X10 <sup>6</sup> /L)   | Group I   | 3.480   | .706       | 2.029                   | 4.931       |
|                             | Group II  | 6.942   | .998       | 4.890                   | 8.995       |
|                             | Group III | 18.400  | 2.118      | 14.046                  | 22.754      |

Abbreviations: Preph.TLC= peripheral total leukocytic count; Vol.= volume of the graft; TNC =total nucleated cells; Wt=weight of the patients; GC= gated cells; DC= dendritic cell
